# Hyperglycemia, Type 2 Diabetes, and Depressive Symptoms

The British Whitehall II study

MIKA KIVIMAKI, PHD<sup>1,2</sup>  
ADAM G. TABAK, MD, PHD<sup>1,3</sup>  
G. DAVID BATTY, PHD<sup>4,5,6</sup>  
ARCHANA SINGH-MANOUX, PHD<sup>1,7</sup>  
MARKUS JOKELA, PHD<sup>1</sup>

TASNIME N. AKBARALY, PHD<sup>1,8</sup>  
DANIEL R. WITTE, MD, PHD<sup>9</sup>  
ERIC J. BRUNNER, PHD<sup>1</sup>  
MICHAEL G. MARMOT, PHD<sup>1</sup>  
DEBBIE A. LAWLOR, MD, PHD<sup>10</sup>

**OBJECTIVE** — To examine the recent suggestion that impaired fasting glucose may protect against depression, whereas a diagnosis of diabetes might then result in depression.

**RESEARCH DESIGN AND METHODS** — Cross-sectional analysis of 4,228 adults (mean age 60.7 years, 73.0% men) who underwent oral glucose tolerance testing and completed the Center for Epidemiologic Studies Depression scale (CES-D).

**RESULTS** — After adjustment for demographic factors, health behaviors, and clinical measurements (BMI, waist circumference, lipid profile, and blood pressure), there was a U-shaped association between fasting glucose and depression ( $P_{\text{curve}} = 0.001$ ), with elevated CES-D at low and very high glucose levels. This finding was replicable with 2-h postload glucose ( $P = 0.11$ ) and A1C ( $P = 0.007$ ).

**CONCLUSIONS** — The U-shaped association between blood glucose and CES-D, with the lowest depression risk seen among those in the normoglycemic range of A1C, did not support the hypothesized protective effect of hyperglycemia.

*Diabetes Care* 32:1867–1869, 2009

The association between type 2 diabetes and depression, both major public health challenges, remains unclear (1–8). In a recent U.S. report, people with type 2 diabetes had an increased risk of depressive symptoms, whereas in nondiabetic individuals higher impaired fasting glucose (IFG) appeared to confer protection against depression (8). Although an increased prevalence of depression in people receiving a diagnosis of a pernicious chronic

disease such as type 2 diabetes is perhaps unsurprising, the apparent counterintuitive protective effect of IFG warrants further scrutiny.

## RESEARCH DESIGN AND METHODS

Data were from the Whitehall II study (9). In the 2003 and 2004 data collection phase, 4,228 men and women aged 50–74 years completed a depression questionnaire and, if without known diabetes, underwent an oral

glucose tolerance test (OGTT). Venous blood samples were taken after at least 8-h fasting, before OGTT, and at 2-h postadministration of a 75 g glucose solution. Blood glucose was measured using the glucose oxidase method (10) on a YSI MODEL 2300 STAT PLUS Analyzer (YSI Corporation, Yellow Springs, OH; mean coefficient of variation [CV] 1.4–3.1%) (11). Diabetes was defined by a fasting glucose  $\geq 7.0$  mmol/l, a 2-h postload glucose  $\geq 11.1$  mmol/l, reported doctor-diagnosed diabetes, or use of diabetes medication (12). In nondiabetic participants, we classified moderate hyperglycemia as IFG (fasting glucose 5.6–6.9 mmol/l) and impaired glucose tolerance (IGT) (2-h postload glucose 7.8–11.0 mmol/l) (12). A1C was measured in whole blood with a calibrated high-performance liquid chromatography system (CV 0.8%).

Depressive symptoms were assessed with the Center for Epidemiologic Studies Depression scale (CES-D) summary score (13), a measure that has been validated among diabetic patients (14). Ethnicity (Caucasian or non-Caucasian), BMI (weight in kilograms divided by height in meters squared [ $\text{kg/m}^2$ ]), waist circumference (cm), systolic and diastolic blood pressure (mmHg), HDL and LDL cholesterol (mmol/l), triglycerides (mmol/l), current smoking (yes/no), alcohol consumption (none, 1–3 units per day, or  $>3$  units per day), and physical inactivity ( $<2.5$  h moderate and  $>1$  h vigorous exercise per week) were measured according to standardized protocols.

Statistical analyses are based on between 3,945 (93% of the 4,228) and 4,228 (100%) of the eligible participants because there were missing data for some of the various glucose parameters. Values for triglycerides were log transformed prior to analyses because of skewed distribution. We used linear regression analysis to model the associations of IFG and IGT with the CES-D score. The shape of the associations between fasting glucose, postload glucose, A1C, and CES-D were studied by treating all these measures as continuous variables. To test for curvilinear

From the <sup>1</sup>Department of Epidemiology and Public Health, University College London, London, U.K.; the <sup>2</sup>Finnish Institute of Occupational Health, Helsinki, Finland; the <sup>3</sup>1st Department of Medicine, Semmelweis University Faculty of Medicine, Budapest, Hungary; the <sup>4</sup>Medical Research Council Social and Public Health Sciences Unit, University of Glasgow, Glasgow, U.K.; the <sup>5</sup>Department of Psychology, Centre for Cognitive Ageing and Cognitive Epidemiology, University of Edinburgh, Edinburgh, U.K.; the <sup>6</sup>Renal and Metabolic Division, The George Institute for International Health, Sydney, Australia; <sup>7</sup>INSERM U687-IFR69, Assistance Publique-Hopitaux de Paris, Paris, France; <sup>8</sup>INSERM U 888, Montpellier F-34093, Montpellier, France; the <sup>9</sup>Steno Diabetes Center, Gentofte, Denmark; and the <sup>10</sup>Medical Research Council, Centre for Causal Analyses in Translational Epidemiology, University of Bristol, Bristol, U.K.

Corresponding author: Mika Kivimaki, m.kivimaki@ucl.ac.uk.

Received 15 April 2009 and accepted 6 July 2009.

Published ahead of print at <http://care.diabetesjournals.org> on 10 July 2009. DOI: 10.2337/dc09-0716.

The funding bodies have not influenced the conduct of this study or any of its conclusions. The views expressed here are those of authors and not necessarily those of any funding body.

© 2009 by the American Diabetes Association. Readers may use this article as long as the work is properly cited, the use is educational and not for profit, and the work is not altered. See <http://creativecommons.org/licenses/by-nc-nd/3.0/> for details.

The costs of publication of this article were defrayed in part by the payment of page charges. This article must therefore be hereby marked "advertisement" in accordance with 18 U.S.C. Section 1734 solely to indicate this fact.

ear trends, a squared term of the glycemic measures was added to an equation containing the linear term. The models were adjusted for age, sex, ethnicity, and clinical characteristics (BMI, waist circumference, systolic and diastolic blood pressure, HDL and LDL cholesterol, triglycerides, smoking status, alcohol consumption, and physical activity). Subsidiary analyses examined these associations in subgroups and in the whole cohort with glucose levels measured repeatedly (in 1997–1999 and in 2003–2004) and with a dichotomized CES-D score ( $<16$  vs.  $\geq 16$ ). The statistical tests were performed with STATA version 10.1.

**RESULTS** — Of the 4,228 participants, 2,038 (73.0%) were men and 3,895 (92.1%) Caucasian. Mean  $\pm$  SD age was  $60.7 \pm 6.0$  years, and the levels of clinical characteristics were  $128 \pm 17$  and  $74 \pm 10$  mmHg for systolic and diastolic blood pressure, respectively,  $1.6 \pm 0.4$  mmol/l for HDL cholesterol,  $3.58 \pm 1.9$  mmol/l for LDL cholesterol,  $26.7 \pm 4.4$  kg/m<sup>2</sup> for BMI, and  $94.2 \pm 10.7$  cm (men) and  $84.3 \pm 13.0$  cm (women) for waist circumference. For triglycerides, median (interquartile range) was 1.2 (0.8–1.6) mmol/l. Of the participants, 7.9% were current smokers, 16.0% were physically inactive, 17.8% consumed more than 3 units of alcohol per day, and 16.2% did not consume alcohol regularly. Overall CES-D mean score was  $9.9 \pm 6.6$ .

### Fasting glucose

Mean  $\pm$  SD for fasting glucose was  $5.55 \pm 1.51$  mmol/l. Compared with participants with normal fasting glucose ( $n = 3,038$ ; CES-D  $9.9 \pm 6.7$ ), those with IFG ( $n = 735$ ) showed a marginally reduced CES-D score ( $9.0 \pm 6.1$ ;  $P = 0.05$ ), whereas those with diabetes ( $n = 455$ ) showed an elevated CES-D score ( $11.2 \pm 7.0$ ;  $P = 0.002$ ) after taking into account age, sex, and ethnicity. As shown in Fig. 1A, there was a U-shaped association between fasting glucose and CES-D ( $P_{\text{curve}} = 0.001$  after adjustment for age, sex, and ethnicity;  $n = 3,986$ ), with elevated CES-D values at glucose levels  $<4.5$  and  $>9.0$  mmol/l. The curvilinear trend was robust to additional adjustment for clinical characteristics ( $P = 0.001$ ).

### Postload glucose

Mean  $\pm$  SD for postload glucose was  $6.38 \pm 2.09$  mmol/l. IGT ( $n = 423$ ; CES-D  $9.49 \pm 6.58$ ) was not associated with CES-D ( $P = 0.75$ ). However, there was a U-shaped association between post-

load glucose and CES-D (Fig. 1B;  $n = 3,455$ ;  $P_{\text{curve}} = 0.05$  after adjustment for age, sex, and ethnicity;  $P_{\text{curve}} = 0.11$  after additional adjustment for clinical characteristics).

### A1C

Mean  $\pm$  SD for A1C was  $5.36 \pm 0.73\%$ . Again, a curvilinear association with CES-D was evident ( $P = 0.04$ ;  $n = 4,160$ ; Fig. 1C). The lowest CES-D scores were between

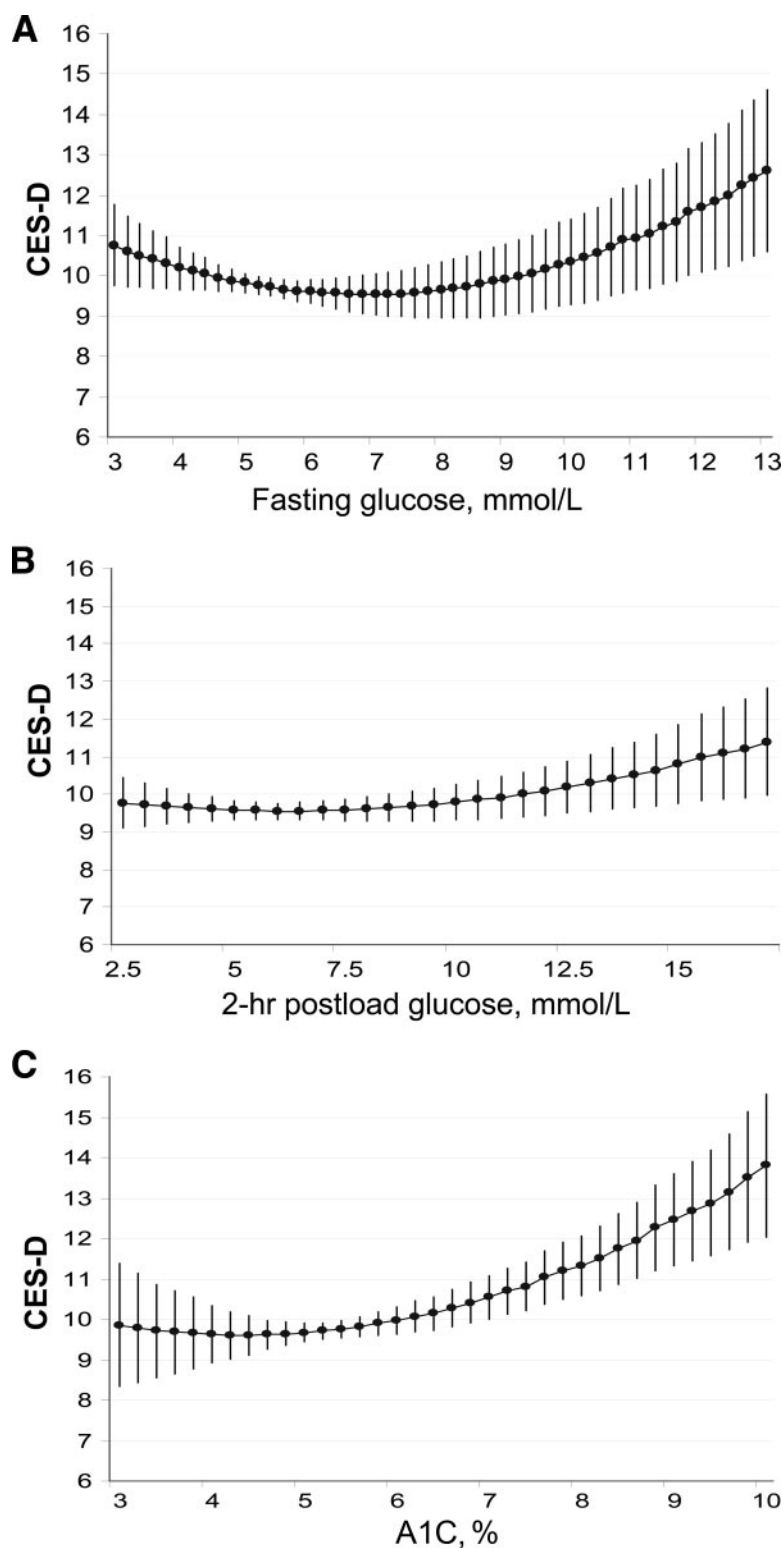

**Figure 1**—Age-, sex, and ethnicity-adjusted associations of fasting glucose (A), 2-h postload glucose (B), and A1C (C) with self-reported depressive symptoms assessed with CES-D.

A1C levels 4.0 and 5.5% (nadir 4.4% in age-, sex-, and ethnicity-adjusted model). The curvilinear trend remained after additional adjustment for all clinical characteristics ( $P = 0.007$ ).

### Subsidiary analyses

There were no differences in the U-shaped associations of the three glucose measures with CES-D between men and women or between Caucasian and non-Caucasian participants (all  $P_{\text{interaction}} = 0.15\text{--}0.74$ ). Using the average of repeated fasting and postload glucose measurements as exposure variables replicated the U-shaped associations ( $P_{\text{curve}} = 0.01$ ). With the dichotomised CES-D score, the U-shaped trend reached statistical significance for repeatedly measured fasting glucose ( $P_{\text{curve}} = 0.02$ ), but for the other glucose measures conventional statistical significance was not met ( $P_{\text{curve}} = 0.09\text{--}0.26$ ). (See supplemental Table 1, available in an online appendix at <http://care.diabetesjournals.org/cgi/content/full/dc09-0716/DC1>.)

**CONCLUSIONS**— Our results show slightly lower levels of depressive symptoms among nondiabetic individuals with IFG. However, this finding was generated by a U-shaped association between fasting glucose and CES-D with elevated depression scores seen at both ends of the glucose distribution, a finding that was replicated for 2-h postload glucose and A1C. Although low depression scores were observed both at normal and prediabetic ranges of fasting and postload glucose, findings from long-term glucose levels (A1C) suggested that normoglycemic individuals had the lowest depression risk. Our results do not support a protective effect of hyperglycemia against depressive symptoms. Future research

should examine whether our findings are generalizable to other populations and whether they are applicable to clinical depression.

**Acknowledgments**— The Whitehall II study has been supported by grants from the Medical Research Council (MRC); British Heart Foundation; Health and Safety Executive; Department of Health; National Heart, Lung, and Blood Institute (HL36310), National Institutes of Health (NIH); National Institute on Aging (AG13196), NIH; Agency for Health Care Policy Research (HS06516); and the John D. and Catherine T. MacArthur Foundation Research Networks on Successful Midlife Development and Socioeconomic Status and Health. M.K. is supported by the Academy of Finland and the BUPA Foundation, U.K.; G.D.B. is a Wellcome Trust Research Fellow; A.S.-M. is supported by a European Young Investigator award from the European Science Foundation; M.G.M. is supported by an MRC Research Professorship; and D.A.L. works in a center that receives some core funding from the U.K. MRC.

No potential conflicts of interest relevant to this article were reported.

### References

1. Polsky D, Doshi JA, Marcus S, Oslin D, Rothbard A, Thomas N, Thompson CL. Long-term risk for depressive symptoms after a medical diagnosis. *Arch Intern Med* 2005;165:1260–1266
2. Palinkas LA, Lee PP, Barrett-Connor E. A prospective study of type 2 diabetes and depressive symptoms in the elderly: the Rancho Bernardo Study. *Diabet Med* 2004;21:1185–1191
3. de Jonge P, Roy JF, Saz P, Marcos G, Lobo A. Prevalent and incident depression in community-dwelling elderly persons with diabetes mellitus: results from the ZARADEMP project. *Diabetologia* 2006;49:2627–2633
4. Brown LC, Majumdar SR, Newman SC, Johnson JA. Type 2 diabetes does not increase risk of depression. *CMAJ* 2006;175:42–46
5. Kim JM, Stewart R, Kim SW, Yang SJ, Shin IS, Yoon JS. Vascular risk factors and incident late-life depression in a Korean population. *Br J Psychiatry* 2006;189:26–30
6. Maraldi C, Volpato S, Penninx BW, Yaffe K, Simonsick EM, Strotmeyer ES, Cesari M, Kritchevsky SB, Perry S, Ayonayon HN, Pahor M. Diabetes mellitus, glycemic control, and incident depressive symptoms among 70- to 79-year-old persons: the health, aging, and body composition study. *Arch Intern Med* 2007;167:1137–1144
7. Boyle SH, Surwit RS, Georgiades A, Brummett BH, Helms MJ, Williams RB, Barefoot JC. Depressive symptoms, race, and glucose concentrations: the role of cortisol as mediator. *Diabetes Care* 2007;30:2484–2488
8. Golden SH, Lazo M, Carnethon M, Bertoni AG, Schreiner PJ, Roux AV, Lee HB, Lyketos C. Examining a bidirectional association between depressive symptoms and diabetes. *JAMA* 2008;299:2751–2759
9. Marmot M, Brunner E. Cohort profile: the Whitehall II study. *Int J Epidemiol* 2005;34:251–256
10. Cooper GR. Methods for determining the amount of glucose in blood. *CRC Crit Rev Clin Lab Sci* 1973;4:101–145
11. Astles JR, Sedor FA, Toffaletti JG. Evaluation of the YSI 2300 glucose analyzer: algorithm-corrected results are accurate and specific. *Clin Biochem* 1996;29:27–31
12. Expert Committee on the Diagnosis and Classification of Diabetes Mellitus. Report of the Expert Committee on the Diagnosis and Classification of Diabetes Mellitus. *Diabetes Care* 2003;26(Suppl. 1):S5–S20
13. Radloff LS, Locke BZ. Center for Epidemiologic Studies Depression Scale (CES-D). In *Handbook of Psychiatric Measures*. Rush AJ, Ed. Washington, DC, American Psychiatric Association, 2000, p. 523–526
14. Fisher L, Chesla CA, Mullan JT, Skaff MM, Kanter RA. Contributors to depression in Latino and European-American patients with type 2 diabetes. *Diabetes Care* 2001;24:1751–1757
